# Supplementary material for: The relevance of mid-Holocene Arctic warming to the future
Source: Copernicus journal article supplement (doi:10.5194/cp-2018-175), 2018-12-17
Supplement: Supplementary file 1 [file cp-2018-175-supplement.pdf]

# **The relevance of mid-Holocene Arctic warming to the future**

## **(Supplementary figures)**

Masakazu Yoshimori<sup>1,2\*</sup> and Marina Suzuki<sup>3</sup>

<sup>1</sup> Faculty of Environmental Earth Science, Global Institution for Collaborative Research and Education, and Arctic Research Center,  
Hokkaido University, Sapporo, Japan

<sup>2</sup> Atmosphere and Ocean Research Institute, The University of Tokyo, Kashiwa, Japan

<sup>3</sup> Graduate School of Environmental Science, Hokkaido University, Sapporo, Japan

Manuscript is to be submitted to *Climate of the Past* (12 December 2018)

---

\* Corresponding author address: Atmosphere and Ocean Research Institute, The University of Tokyo, 5-1-5, Kashiwanoha, Kashiwa, Chiba 277-8568 Japan  
Phone: +81-4-7136-4380, Fax: +81-4-7136-4375, E-mail: [masakazu@aori.u-tokyo.ac.jp](mailto:masakazu@aori.u-tokyo.ac.jp)

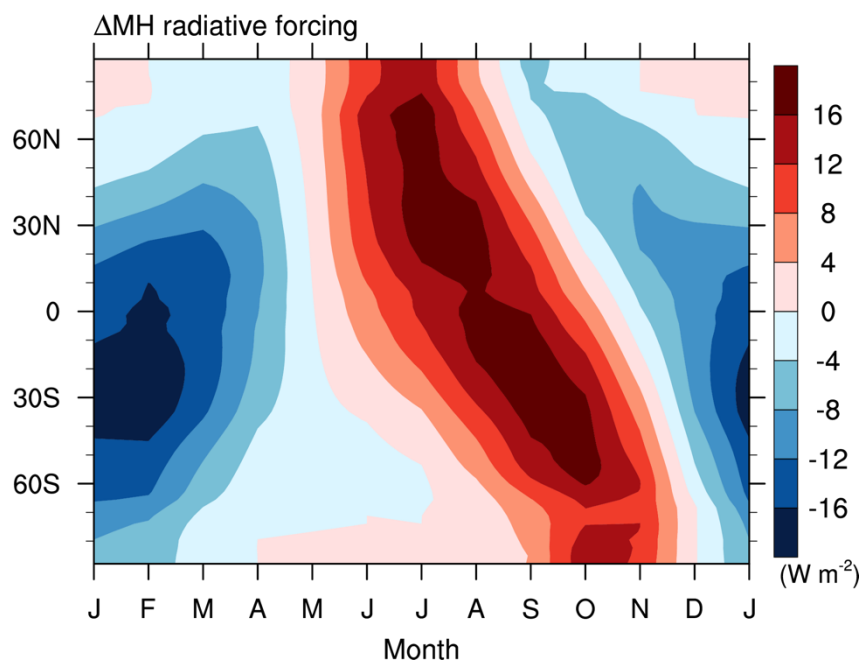

1  
2  
3  
4  
5  
6

Fig. S1 Seasonal progress of the zonal mean radiative forcing calculated with the insolation anomaly for  $\Delta\text{MH}$  and planetary albedo from the PI experiment ( $\text{W m}^{-2}$ ). The mean of all 10 models was used. See main text for details.

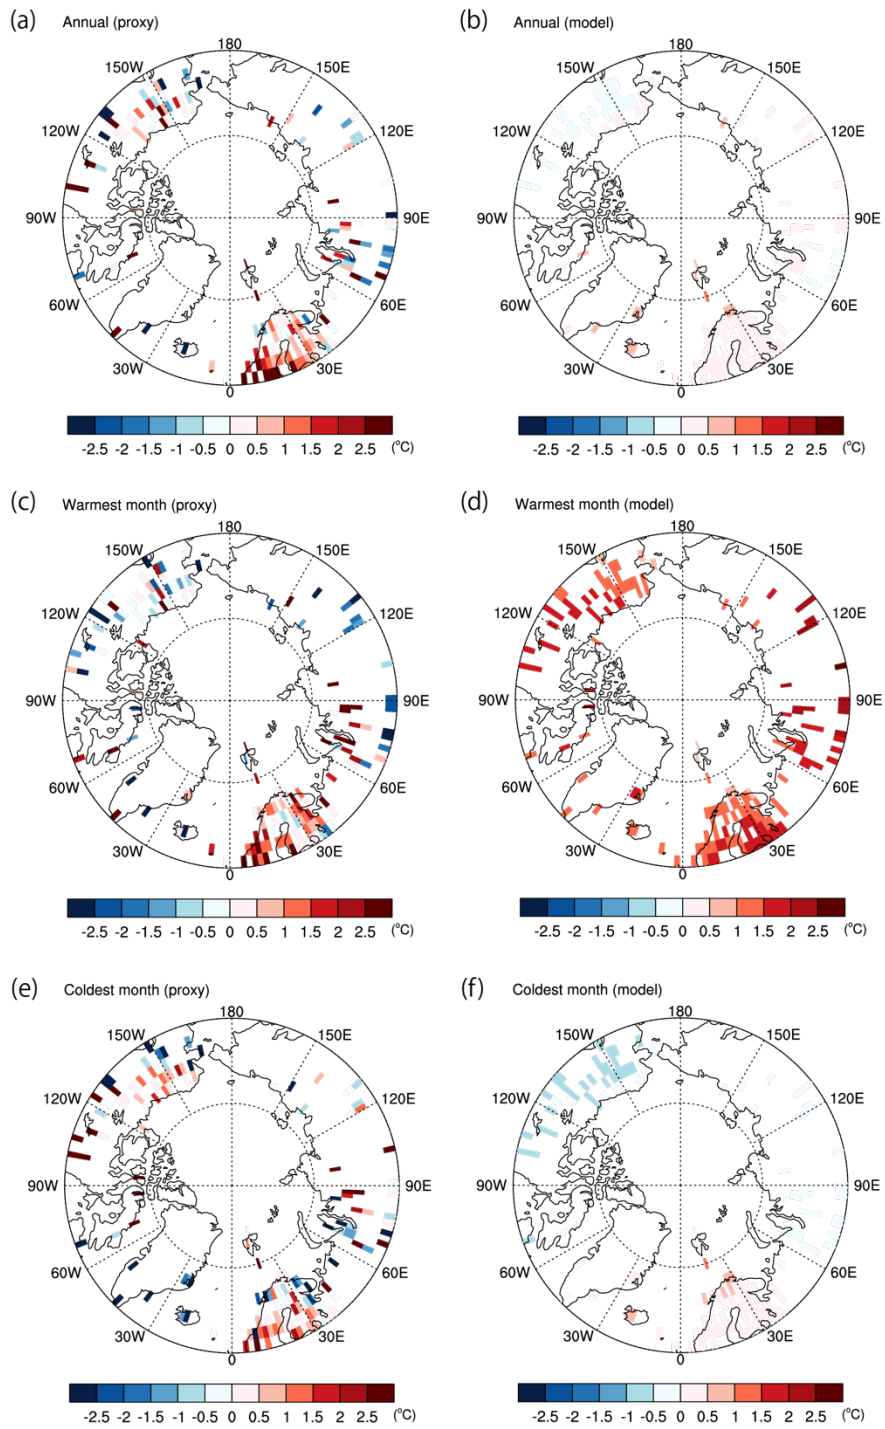

7  
8  
9 Fig. S2 Surface air temperature anomaly ( $^{\circ}\text{C}$ ) for  $\Delta\text{MH}$  from the reconstruction (left) and  
10 simulations (right): (a) & (b) annual mean, (c) & (d) warmest month, and (e) & (f) coldest  
11 month. The reconstruction data are taken from the extended data of Bartlein et al. (2011). The  
12 mean of all 10 model simulations was used.

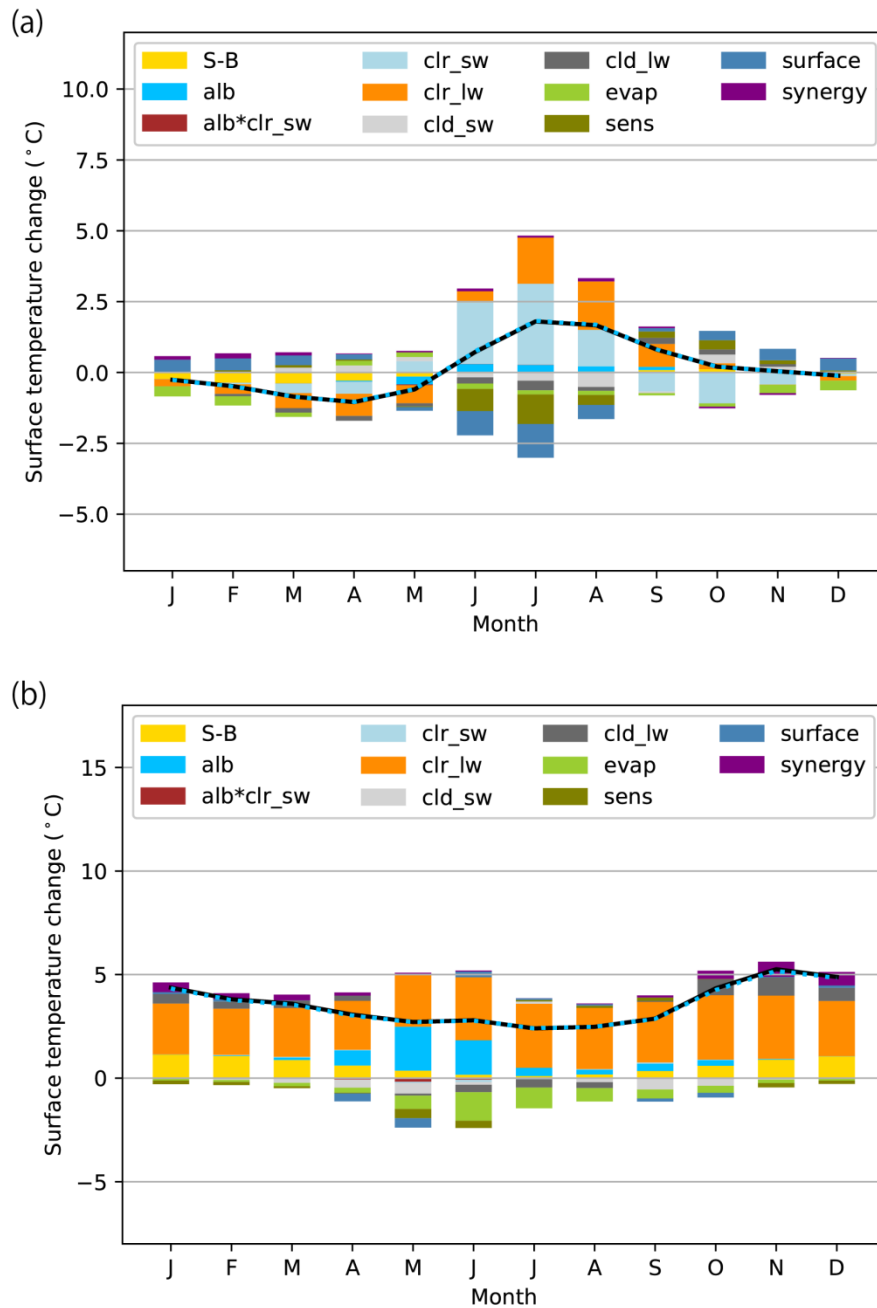

14  
 15  
 16  
 17  
 18  
 19  
 20

Figure S3 Simulated and diagnosed surface temperature changes ( $^{\circ}$ C) for the land (north of  $60^{\circ}$ N): (a)  $\Delta$ MH; and (b)  $\Delta$ RCP4.5. The black lines denote simulated changes and blue dashed lines denote the sum of diagnosed partial changes. The graphs represent the means of all 10 models. See Table 3 for the interpretation of each component.

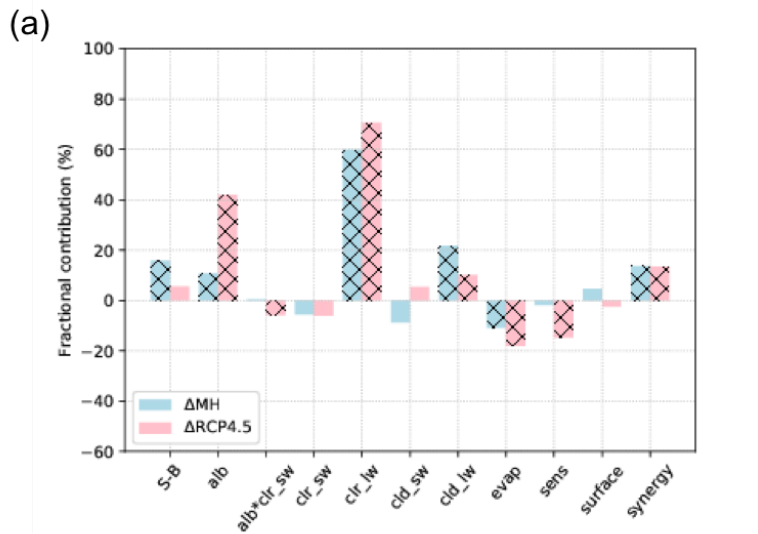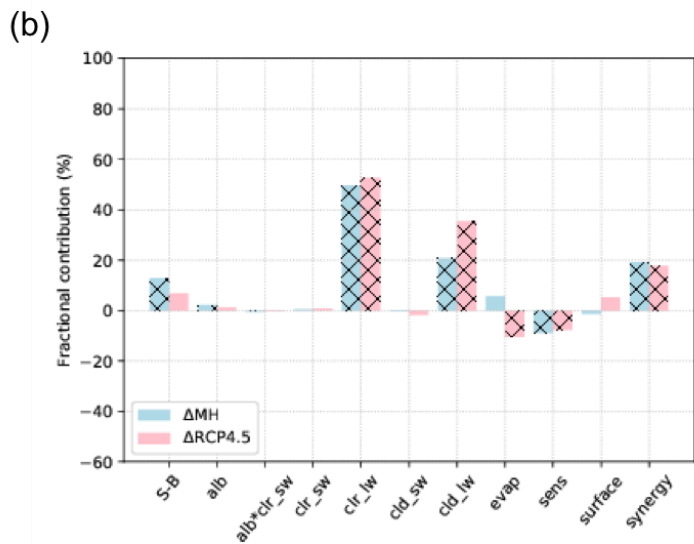

21  
 22  
 23  
 24  
 25  
 26  
 27  
 28

Figure S4 Fractional contribution of individual processes to the simulated surface temperature change (%) over the land (north of 60°N) for  $\Delta MH$  and  $\Delta RCP4.5$ : (a) annual mean; (b) October-November-December mean. The sum of the bar graphs in the same color for each plot adds up to 100%. The hatching indicates the contribution is statistically significant at the 10% level. All 10 models are used. See Table 3 for the interpretation of each component.

29 **Reference**

30 Bartlein, P. J., and Coauthors: Pollen-based continental climate reconstructions at 6 and 21  
31 ka: a global synthesis. *Climate Dynamics*, **37**, 775-802. DOI  
32 10.1007/s00382-010-0904-1, 2011

33
